# Supplementary material for: Annual hepatitis C testing and positive tests among gay and bisexual men in Australia from 2016 to 2022: a serial cross-sectional analysis of sentinel surveillance data
Source: PubMed Central journal article supplement (PMC11287637; doi:10.1136/sextrans-2024-056175), 2024-06-20
Supplement: sextrans-2024-056175supp001.pdf [file sextrans-2024-056175supp001.pdf]

| ID      | Event Date  | HCV antibody | HCV RNA  | PrEP prescription | HIV diagnosis date | Inclusion eligibility |
|---------|-------------|--------------|----------|-------------------|--------------------|-----------------------|
| 8761349 | 05 Dec 2018 | .            | .        | No                | .                  | None                  |
| 8761349 | 12 Mar 2019 | Negative     | .        | Yes               | .                  | Antibody testing      |
| 8761349 | 07 Aug 2019 | .            | .        | Yes               | .                  | Antibody testing      |
| 8761349 | 23 Dec 2019 | .            | .        | Yes               | .                  | Antibody testing      |
| 8761349 | 20 Jul 2020 | .            | .        | No                | .                  | None                  |
| 8761349 | 22 Dec 2020 | .            | .        | No                | .                  | None                  |
| 8761349 | 28 Nov 2021 | Positive     | .        | Yes               | .                  | Antibody testing      |
| 8761349 | 10 Dec 2021 | .            | Positive | Yes               | .                  | Naive RNA testing     |
| 8761349 | 18 Mar 2022 | .            | Negative | Yes               | .                  | None                  |
| 8761349 | 13 Jul 2022 | .            | .        | Yes               | .                  | Follow-up RNA testing |

Supplementary Figure 1. Hypothetical person whose first record is 5<sup>th</sup> Dec 2018 with a no PrEP prescription is not included. They are eligible for the antibody testing analyses in 2019 as they have PrEP prescription data but not in 2020. Their progression through each testing definition is shown based on time updated HCV results when they have PrEP prescription data again in 2021 and 2022.

|         | Event Date  | HCV antibody | HCV RNA  | PrEP prescription | HIV diagnosis date | Inclusion eligibility |
|---------|-------------|--------------|----------|-------------------|--------------------|-----------------------|
| 4356099 | 2 Mar 2016  | .            | .        | No                | .                  | None                  |
| 4356099 | 21 Dec 2016 | .            | .        | No                | .                  | None                  |
| 4356099 | 13 Jul 2017 | Negative     | .        | No                | 13 Jul 2017        | Antibody testing      |
| 4356099 | 9 Dec 2017  | .            | .        | N/A               | 13 Jul 2017        | Antibody testing      |
| 4356099 | 20 Jul 2018 | .            | .        | N/A               | 13 Jul 2017        | Antibody testing      |
| 4356099 | 22 Dec 2018 | .            | .        | N/A               | 13 Jul 2017        | Antibody testing      |
| 4356099 | 28 Jul 2019 | Positive     | .        | N/A               | 13 Jul 2017        | Antibody testing      |
| 4356099 | 14 Aug 2019 | Positive     | Negative | N/A               | 13 Jul 2017        | Naive RNA testing     |
| 4356099 | 18 Dec 2019 | .            | .        | N/A               | 13 Jul 2017        | Naive RNA testing     |
| 4356099 | 3 Mar 2020  | .            | .        | N/A               | 13 Jul 2017        | Naive RNA testing     |
| 4356099 | 19 Jul 2020 | .            | .        | N/A               | 13 Jul 2017        | Naive RNA testing     |
| 4356099 | 20 Dec 2020 | .            | .        | N/A               | 13 Jul 2017        | Naive RNA testing     |
| 4356099 | 17 Jul 2021 | Positive     | Positive | N/A               | 13 Jul 2017        | Naive RNA testing     |
| 4356099 | 30 Jul 2021 | .            | Positive | N/A               | 13 Jul 2017        | None                  |
| 4356099 | 28 Sep 2021 | .            | Negative | N/A               | 13 Jul 2017        | None                  |

Supplementary Figure 2. Hypothetical person whose first record is 2<sup>nd</sup> March 2016. They are not eligible for inclusion in any analysis until 13<sup>th</sup> July 2017 when they have a record of a HIV diagnosis. They are defined as having an HCV antibody test in 2017 and 2019 but *not* 2018. Following their first antibody positive test on 28<sup>th</sup> July 2019, they are no longer eligible for inclusion in the antibody testing analysis and become eligible for the initial HCV RNA testing analysis. They are defined as having an HCV RNA test in 2019 and 2021, but *not* in 2020. They are no longer eligible for the initial HCV RNA testing analysis following their first positive HCV RNA test result on 17<sup>th</sup> July 2021.

| ID      | Event Date  | HCV antibody | HCV RNA  | PrEP prescription | HIV diagnosis date | Inclusion eligibility |
|---------|-------------|--------------|----------|-------------------|--------------------|-----------------------|
| 4560965 | 20 May 2016 | Positive     | Positive | N/A               | 10 Nov 2013        | None                  |
| 4560965 | 22 Dec 2016 | .            | Negative | N/A               | 10 Nov 2013        | None                  |
| 4560965 | 19 Jul 2017 | .            | .        | N/A               | 10 Nov 2013        | Follow-up RNA testing |
| 4560965 | 23 Dec 2017 | .            | Negative | N/A               | 10 Nov 2013        | Follow-up RNA testing |
| 4560965 | 20 Jul 2018 | .            | .        | N/A               | 10 Nov 2013        | Follow-up RNA testing |
| 4560965 | 22 Dec 2018 | .            | .        | N/A               | 10 Nov 2013        | Follow-up RNA testing |
| 4560965 | 28 Jul 2019 | .            | .        | N/A               | 10 Nov 2013        | Follow-up RNA testing |
| 4560965 | 10 Feb 2020 | Positive     | Positive | N/A               | 10 Nov 2013        | Follow-up RNA testing |
| 4560965 | 20 May 2020 | .            | Negative | N/A               | 10 Nov 2013        | None                  |

Supplementary Figure 3. Hypothetical person whose first record is 20<sup>th</sup> May 2016 with a positive HCV RNA test. They are eligible for the HCV RNA follow-up testing analysis *after* their first negative test on 22<sup>nd</sup> December 2016. They are defined as having an HCV RNA follow-up test in 2017 and 2020 but *not* in 2018 or 2019. Following their new RNA positive test on 10<sup>th</sup> February 2020, they are no longer eligible for inclusion in the follow-up HCV RNA testing analysis.
